# Supplementary material
Source: PubMed Central journal article supplement (PMC34633)
Supplement: pnas_121094298_1.pdf [file pnas_121094298_1.pdf]

**Table 1.** List of sampling sites and settings

| <b>Site</b> | <b>Latitude</b> | <b>Longitude</b> | <b>Elevation, m</b> | <b>Setting</b> | <b>Formation</b> |
|-------------|-----------------|------------------|---------------------|----------------|------------------|
| 7U-1, 2, 3  | 38 18.64        | 109 51.48        | 1,899               | Pothole        | Kayenta          |
| 7U-4, 5, 6  | 38 22.62        | 109 52.20        | 1,871               | Pothole        | Navajo           |
| 7U-7        | 38 10.00        | 109 48.46        | 1,551               | Pothole        | Cutler           |
| 7U-8        | 38 09.99        | 109 48.44        | 1,553               | Grassland      | Cutler           |
| 7U-9        | 38 09.12        | 109 48.12        | 1,570               | Pothole        | Cutler           |
| 7U-10       | 38 10.24        | 109 42.16        | 1,539               | Grassland      | Cutler           |
| 7U-11       | 38 12.25        | 109 22.44        | 1,750               | Mesa top       | Cutler Ls        |
| 7U-12       | 38 47.74        | 109 42.39        | 1,512               | Pothole        | Entrada          |
| UES-3       | 37 59.01        | 110 14.85        | 1,652               | Mesa top       | Cutler           |

Three potholes were sampled on Kayenta and Navajo formations. Latitude and longitude are in degrees and decimal minutes. Formation refers to rock-unit substrate for potholes and mesa tops, or nearest outcrop for the other settings. Site, sampling site; Ls, limestone.
