# Supplementary material
Source: PubMed Central journal article supplement (PMC34633)
Supplement: pnas_121094298_3.pdf [file pnas_121094298_3.pdf]

**Table 2.** Summary of magnetic-property results (Canyonlands area, Utah)

| Sample site | Depth (cm) or rock unit | <i>N</i> | MS, m <sup>3</sup> kg <sup>-1</sup> | FDMS, m <sup>3</sup> kg <sup>-1</sup> | FDMS, % | HIRM, Am <sup>2</sup> kg <sup>-1</sup> |
|-------------|-------------------------|----------|-------------------------------------|---------------------------------------|---------|----------------------------------------|
| 7U-1, 2, 3  | <0.25                   | 3        | 9.18E-08                            | 1.27E-09                              | 1.0     | 4.34E-04                               |
|             | <0.5                    | 7        | 7.24E-08                            | 2.12E-09                              | 2.8     | 3.76E-04                               |
|             | 0.5–2.0                 | 7        | 7.15E-08                            | 2.01E-09                              | 3.0     | 4.32E-04                               |
|             | 2.0–5.0                 | 4        | 7.16E-08                            | 1.96E-09                              | 2.7     | 4.74E-04                               |
|             | <i>Kayenta (red)</i>    | 3        | 8.19E-09                            | -4.63E-09                             | —       | 1.64E-04                               |
| 7U-4, 5, 6  | <0.25                   | 5        | 8.71E-08                            | 1.70E-09                              | 2.2     | 2.77E-04                               |
|             | <0.5                    | 7        | 7.77E-08                            | 1.31E-09                              | 1.5     | 2.38E-04                               |
|             | 0.5–2.0                 | 7        | 7.56E-08                            | 1.66E-09                              | 1.5     | 2.35E-04                               |
|             | 2.0–5.0                 | 4        | 6.70E-08                            | 8.03E-10                              | 1.3     | 2.32E-04                               |
|             | <i>Navajo</i>           | 3        | 4.01E-09                            | -3.24E-09                             | —       | 4.02E-05                               |
| 7U-7        | <0.25                   | 2        | 1.86E-07                            | 4.48E-09                              | 2.4     | 3.84E-04                               |
|             | <0.5                    | 3        | 1.98E-07                            | 3.90E-09                              | 1.8     | 3.96E-04                               |
|             | 0.5–2.0                 | 2        | 1.61E-07                            | 4.22E-09                              | 2.4     | 3.42E-04                               |
|             | 2.0–5.0                 | 3        | 1.74E-07                            | 4.27E-09                              | 2.2     | 3.49E-04                               |
|             | <i>Cutler</i>           | 1        | 2.45E-10                            | -5.39E-09                             | —       | 4.89E-05                               |
| 7U-8        | <0.25                   | 2        | 1.63E-07                            | 4.12E-09                              | 2.4     | 3.45E-04                               |
|             | <0.5                    | 2        | 1.20E-07                            | 3.34E-09                              | 2.7     | 2.77E-04                               |
|             | 0.5–2.0                 | 2        | 8.06E-08                            | 1.88E-09                              | 2.3     | 1.97E-04                               |
|             | 2.0–5.0                 | 2        | 1.05E-07                            | 3.86E-09                              | 3.4     | 2.35E-04                               |
|             | <i>Cutler</i>           | 1        | -1.68E-09                           | -2.77E-09                             | —       | 1.73E-05                               |
| 7U-9        | <0.25                   | 2        | 1.17E-07                            | 2.41E-09                              | 2.0     | 4.36E-04                               |
|             | <0.5                    | 2        | 1.15E-07                            | 2.19E-09                              | 1.9     | 4.39E-04                               |
|             | 0.5–2.0                 | 2        | 7.11E-08                            | 1.91E-09                              | 2.6     | 4.45E-04                               |
|             | 2.0–5.0                 | 2        | 3.74E-08                            | -1.71E-10                             | -0.4    | 3.87E-04                               |
|             | <i>Cutler (red)</i>     | 1        | 9.20E-09                            | -6.83E-09                             | —       | 2.59E-04                               |
| 7U-10       | <0.25                   | 1        | 1.46E-07                            | 1.84E-09                              | 1.2     | 5.08E-04                               |
|             | <0.5                    | 1        | 1.17E-07                            | 2.40E-09                              | 2.0     | 4.50E-04                               |
|             | 0.5–2.0                 | 1        | 9.29E-08                            | 2.68E-09                              | 2.8     | 4.03E-04                               |
|             | 2.0–5.0                 | 1        | 9.52E-08                            | 2.55E-09                              | 2.6     | 4.09E-04                               |
|             | <i>Cutler (red)</i>     | 1        | 5.34E-10                            | 7.10E-09                              | —       | 8.09E-05                               |
| 7U-11       | <0.25                   | 2        | 1.44E-07                            | 4.27E-09                              | 2.9     | 4.45E-04                               |
|             | <0.5                    | 2        | 1.05E-07                            | 2.64E-09                              | 2.4     | 3.43E-04                               |
|             | 0.5–2.0                 | 2        | 8.03E-08                            | 1.26E-09                              | 1.5     | 2.87E-04                               |
|             | 2.0–5.0                 | 2        | 1.06E-07                            | 3.89E-09                              | 3.5     | 3.35E-04                               |
|             | <i>Cutler Ls.</i>       | 1        | 1.06E-08                            | -6.43E-09                             | —       | 2.75E-06                               |
| 7U-12       | <0.25                   | 1        | 6.46E-08                            | 3.36E-10                              | 0.5     | 2.12E-04                               |
|             | <0.5                    | 2        | 4.41E-08                            | -2.13E-10                             | -0.5    | 1.48E-04                               |
|             | 0.5–2.0                 | 1        | 2.14E-08                            | -4.40E-10                             | -2.1    | 8.56E-05                               |
|             | 2.0–5.0                 | 1        | 2.90E-08                            | -1.90E-10                             | -0.7    | 1.17E-04                               |

|       |                |          |                 |                  |     |                 |
|-------|----------------|----------|-----------------|------------------|-----|-----------------|
|       | <i>Entrada</i> | <i>1</i> | <i>2.92E-09</i> | <i>-3.62E-09</i> | —   | <i>4.62E-06</i> |
| UES-3 | <0.5           | 2        | 1.63E-07        | 2.74E-09         | 1.7 | 4.76E-04        |
|       | 1–10           | 2        | 1.21E-07        | 2.23E-09         | 1.8 | 1.49E-04        |
|       | <i>Cutler</i>  | <i>4</i> | <i>6.61E-09</i> | <i>-3.70E-09</i> | —   | <i>1.06E-05</i> |

---

*N*, number of specimens; MS, magnetic susceptibility; FDMS, frequency-dependent MS; IRM, isothermal remanent magnetization acquired in a 0.3-T induction; HIRM, hard IRM (see text).  
Red indicates redbed. Ls, limestone.
