# Supplementary material
Source: PubMed Central journal article supplement (PMC34633)
Supplement: pnas_121094298_4.pdf [file pnas_121094298_4.pdf]

**Table 3.** Summary of XRF geochemical data from surficial deposits and associated rock substrates (Canyonlands area, Utah)

| Site       | Sample type          | Depth,<br>cm | N | Ti,<br>wt % | Fe, wt<br>% | Zr,<br>ppm | V,<br>ppm | Cr,<br>ppm | Mn,<br>ppm | Ni,<br>ppm | Cu,<br>ppm | Zn,<br>ppm | Rb,<br>ppm | Sr,<br>ppm | Y,<br>ppm | Nb,<br>ppm | Mo,<br>ppm | Sn,<br>ppm | Sb,<br>ppm | Cs,<br>ppm | Ba,<br>ppm | La,<br>ppm | Ce,<br>ppm |
|------------|----------------------|--------------|---|-------------|-------------|------------|-----------|------------|------------|------------|------------|------------|------------|------------|-----------|------------|------------|------------|------------|------------|------------|------------|------------|
| 7U-1, 2, 3 | Crust                | 0–0.5        | 7 | 0.16        | 1.03        | 235        | 25        | 44         | 326        | 18         | 16         | 29         | 50         | 61         | 13        | 15         | 13         | 7          | 1          | 19         | 491        | 17         | 19         |
|            | Soil under crust     | 0.5–2.0      | 7 | 0.16        | 1.14        | 197        | 28        | 42         | 393        | 19         | 15         | 31         | 52         | 61         | 14        | 15         | 11         | 6          | 2          | 19         | 495        | 12         | 25         |
|            | Soil under crust     | 2.0–5.0      | 4 | 0.17        | 1.25        | 194        | 26        | 45         | 376        | 21         | 15         | 30         | 51         | 60         | 12        | 20         | 15         | 6          | 1          | 13         | 506        | 14         | 24         |
|            | <i>Red sandstone</i> |              | 3 | 0.10        | 0.87        | 153        | 17        | 49         | 333        | 17         | 14         | 22         | 46         | 45         | 15        | 5          | 3          | 5          | 1          | 2          | 316        | 16         | 15         |
| 7U-4, 5, 6 | Crust                | 0–0.5        | 7 | 0.15        | 0.92        | 226        | 21        | 41         | 181        | 18         | 13         | 29         | 58         | 77         | 7         | 15         | 12         | 4          | 2          | 13         | 426        | 6          | 15         |
|            | Soil under crust     | 0.5–2.0      | 7 | 0.16        | 0.94        | 178        | 39        | 33         | 183        | 18         | 13         | 26         | 60         | 89         | 6         | 16         | 14         | 3          | 1          | 15         | 423        | 10         | 22         |
|            | Soil under crust     | 2.0–5.0      | 4 | 0.16        | 0.98        | 155        | 20        | 35         | 179        | 19         | 14         | 26         | 56         | 96         | 4         | 22         | 19         | 3          | 1          | 16         | 399        | 13         | 9          |
|            | <i>Sandstone</i>     |              | 3 | 0.08        | 0.58        | 110        | 11        | 43         | 71         | 15         | 11         | 23         | 63         | 67         | 7         | 5          | 3          | 4          | 2          | 22         | 433        | 6          | 12         |
| 7U-7       | Crust/surface        | 0–0.5        | 2 | 0.21        | 1.19        | 517        | 31        | 54         | 197        | 19         | 17         | 44         | 50         | 92         | 17        | 19         | 15         | 3          | 1          | 23         | 364        | 21         | 29         |
|            | Soil under crust     | 0.5–2.0      | 2 | 0.18        | 1.16        | 281        | 36        | 47         | 192        | 22         | 15         | 41         | 43         | 85         | 8         | 20         | 15         | 3          | 2          | 17         | 404        | 24         | 45         |
|            | Soil under crust     | 2.0–5.0      | 3 | 0.19        | 1.28        | 326        | 38        | 41         | 231        | 20         | 15         | 52         | 49         | 81         | 17        | 17         | 13         | 6          | 2          | 14         | 456        | 15         | 29         |
|            | <i>Sandstone</i>     |              | 1 | 0.056       | 0.54        | 51         | 2         | 43         | 116        | 16         | 3          | 4          | 27         | 58         | 8         | 5          | 3          | 2          | 2          | 29         | 208        | 0          | 2          |
| 7U-8       | Crust                | 0–0.5        | 2 | 0.15        | 0.96        | 290        | 26        | 43         | 191        | 16         | 11         | 31         | 37         | 75         | 9         | 18         | 19         | 4          | 2          | 7          | 339        | 14         | 11         |
|            | Soil under crust     | 0.5–2.0      | 2 | 0.14        | 0.83        | 208        | 15        | 41         | 167        | 16         | 11         | 28         | 30         | 68         | 5         | 21         | 17         | 2          | 1          | 22         | 338        | 13         | 22         |
|            | Soil under crust     | 2.0–5.0      | 2 | 0.14        | 0.93        | 221        | 27        | 39         | 183        | 17         | 12         | 30         | 43         | 89         | 13        | 13         | 10         | 4          | 2          | 17         | 357        | 13         | 6          |
|            | <i>Sandstone</i>     |              | 1 | 0.052       | 0.47        | 46         | 8         | 48         | 60         | 14         | 7          | 21         | 23         | 46         | 4         | 7          | 2          | 5          | 2          | 18         | 167        | 18         | 2          |
| 7U-9       | Crust                | 0–0.5        | 2 | 0.16        | 1.18        | 190        | 28        | 47         | 199        | 22         | 12         | 28         | 53         | 128        | 16        | 8          | 3          | 8          | 2          | 7          | 383        | 28         | 16         |
|            | Soil under crust     | 0.5–2.0      | 2 | 0.14        | 1.18        | 133        | 22        | 43         | 171        | 22         | 12         | 32         | 58         | 108        | 13        | 8          | 3          | 4          | 1          | 16         | 389        | 9          | 8          |
|            | Soil under crust     | 2.0–5.0      | 2 | 0.11        | 1.03        | 112        | 14        | 39         | 121        | 18         | 7          | 20         | 50         | 79         | 12        | 12         | 11         | 4          | 2          | 21         | 419        | 21         | 17         |
|            | <i>Red sandstone</i> |              | 1 | 0.100       | 0.85        | 165        | 13        | 40         | 46         | 13         | 6          | 7          | 45         | 49         | 5         | 7          | 3          | 2          | 2          | 36         | 596        | 20         | 24         |
| 7U-10      | Crust                | 0–0.5        | 1 | 0.160       | 1.13        | 283        | 36        | 41         | 255        | 18         | 15         | 30         | 47         | 81         | 10        | 17         | 16         | 7          | 2          | 20         | 582        | 15         | 43         |
|            | Soil under crust     | 0.5–2.0      | 1 | 0.150       | 1.17        | 218        | 37        | 44         | 245        | 18         | 11         | 29         | 58         | 88         | 14        | 7          | 5          | 3          | 2          | 25         | 454        | 7          | 2          |
|            | Soil under crust     | 2.0–5.0      | 1 | 0.140       | 1.19        | 226        | 24        | 41         | 248        | 17         | 13         | 33         | 51         | 96         | 10        | 17         | 15         | 5          | 1          | 17         | 355        | 16         | 17         |
|            | <i>Red sandstone</i> |              | 1 | 0.053       | 0.53        | 55         | 2         | 48         | 392        | 17         | 9          | 23         | 28         | 78         | 10        | 5          | 3          | 5          | 2          | 7          | 322        | 20         | 2          |
| 7U-11      | Crust                | 0–0.5        | 2 | 0.16        | 1.01        | 353        | 20        | 45         | 382        | 18         | 13         | 36         | 47         | 94         | 9         | 18         | 15         | 5          | 2          | 35         | 510        | 28         | 25         |
|            | Soil under crust     | 0.5–2.0      | 2 | 0.14        | 0.90        | 256        | 11        | 46         | 390        | 17         | 13         | 31         | 49         | 121        | 10        | 12         | 9          | 4          | 2          | 10         | 475        | 5          | 17         |
|            | Soil under crust     | 2.0–5.0      | 2 | 0.15        | 1.03        | 197        | 46        | 31         | 525        | 17         | 13         | 47         | 43         | 123        | 10        | 19         | 16         | 6          | 2          | 4          | 481        | 15         | 26         |
|            | <i>Limestone</i>     |              |   | 0.046       | 0.53        | 34         | 2         | 25         | 1500       | 27         | 0          | 266        | 20         | 95         | 8         | 6          | 2          | 8          | 3          | 31         | 216        | 11         | 2          |
| 7U-12      | Crust                | 0–0.5        | 2 | 0.11        | 0.71        | 205        | 23        | 46         | 145        | 14         | 17         | 16         | 27         | 41         | 4         | 15         | 18         | 3          | 1          | 27         | 345        | 13         | 13         |
|            | Soil under crust     | 0.5–2.0      | 1 | 0.093       | 0.61        | 133        | 17        | 31         | 131        | 15         | 13         | 31         | 34         | 45         | 10        | 4          | 3          | 4          | 1          | 22         | 246        | 7          | 2          |
|            | Soil under crust     | 2.0–5.0      | 1 | 0.086       | 0.69        | 155        | 14        | 51         | 135        | 14         | 14         | 13         | 34         | 43         | 7         | 5          | 3          | 3          | 1          | 0          | 303        | 17         | 2          |

|        |                  |   |       |      |    |    |    |    |    |    |    |    |    |   |   |   |   |   |   |     |   |    |
|--------|------------------|---|-------|------|----|----|----|----|----|----|----|----|----|---|---|---|---|---|---|-----|---|----|
|        | <i>Sandstone</i> | 1 | 0.075 | 0.53 | 99 | 9  | 56 | 61 | 14 | 12 | 24 | 26 | 31 | 7 | 6 | 2 | 4 | 2 | 7 | 231 | 5 | 2  |
| BHVO-1 | SD               | 6 | 0.010 | 0.04 | 5  | 73 | 22 | 0  | 10 | 3  | 2  | 1  | 7  | 2 | 6 | 5 | 1 | 0 | 7 | 17  | 8 | 15 |
| GSP-1  | SD               | 2 | 0.0   | 0.0  | 12 | 8  | 0  | 4  | 1  | 0  | 1  | 3  | 5  | 1 | 0 | 0 | 0 | 0 | 3 | 50  | 6 | 4  |

---

Crust, biologic soil crust; *N*, number of samples; wt %, weight percent; SD, standard deviation for standard reference materials, granite (GSP-1) and Hawaiian basalt (BHVO-1).
