# Supplementary material
Source: PubMed Central journal article supplement (PMC34633)
Supplement: pnas_121094298_5.pdf [file pnas_121094298_5.pdf]

**Table 4.** XRF geochemical summaries of rocks and surficial sediments grouped by depth

| Sample type      | Depth and<br><i>N</i>       | Statistics | Ti, wt<br>% | Fe, wt<br>% | Zr,<br>ppm | V,<br>ppm | Cr,<br>ppm | Mn,<br>ppm | Ni,<br>ppm | Cu,<br>ppm | Zn,<br>ppm | Rb,<br>ppm | Sr,<br>ppm | Y,<br>ppm | Nb,<br>ppm | Mo,<br>ppm | Sn,<br>ppm | Sb,<br>ppm | Cs,<br>ppm | Ba,<br>ppm | La,<br>ppm | Ce,<br>ppm |
|------------------|-----------------------------|------------|-------------|-------------|------------|-----------|------------|------------|------------|------------|------------|------------|------------|-----------|------------|------------|------------|------------|------------|------------|------------|------------|
| Crust            | <0.5 cm<br><i>N</i> = 25    | mean       | 0.15        | 1.00        | 268.1      | 24.8      | 44.7       | 226.1      | 18.0       | 14.5       | 29.7       | 49.4       | 75.1       | 11.1      | 15.5       | 13.2       | 5.4        | 1.5        | 16.6       | 430.6      | 14.4       | 18.1       |
|                  |                             | SD         | 0.03        | 0.16        | 130.3      | 10.0      | 7.5        | 80.4       | 2.9        | 3.1        | 8.2        | 10.8       | 22.3       | 5.6       | 5.7        | 7.1        | 3.6        | 0.6        | 9.7        | 97.6       | 8.7        | 15.4       |
| Soil under crust | 0.5–2.0 cm<br><i>N</i> = 21 | mean       | 0.15        | 1.03        | 192.5      | 30.7      | 39.4       | 236.3      | 18.5       | 13.6       | 30.0       | 51.8       | 78.7       | 9.5       | 15.1       | 11.8       | 3.7        | 1.5        | 18.0       | 427.0      | 11.8       | 21.6       |
|                  |                             | SD         | 0.02        | 0.19        | 44.7       | 14.3      | 7.9        | 108.7      | 3.2        | 3.0        | 7.7        | 12.8       | 18.9       | 5.2       | 6.8        | 7.0        | 3.3        | 0.7        | 7.4        | 106.8      | 10.9       | 17.5       |
| Soil under crust | 2.0–5.0 cm<br><i>N</i> = 18 | mean       | 0.15        | 1.09        | 200.0      | 24.7      | 40.6       | 245.1      | 19.2       | 13.2       | 31.0       | 50.2       | 77.4       | 11.1      | 16.6       | 13.2       | 4.5        | 1.5        | 14.6       | 423.0      | 14.6       | 17.2       |
|                  |                             | SD         | 0.04        | 0.21        | 76.7       | 12.6      | 6.1        | 119.3      | 2.8        | 3.0        | 11.8       | 7.0        | 18.2       | 5.6       | 6.5        | 6.5        | 2.7        | 0.4        | 7.6        | 83.7       | 9.1        | 16.9       |
| Rock             | <i>N</i> = 11               | mean       | 0.08        | 0.66        | 109.5      | 10.6      | 46.4       | 171.6      | 15.5       | 10.2       | 19.3       | 43.2       | 54.1       | 9.0       | 5.5        | 2.8        | 3.9        | 1.7        | 15.3       | 342.9      | 11.8       | 10.3       |
|                  |                             | SD         | 0.02        | 0.18        | 49.5       | 8.2       | 6.0        | 185.7      | 1.5        | 3.7        | 7.9        | 15.8       | 15.0       | 4.3       | 0.7        | 0.8        | 1.6        | 0.5        | 12.6       | 134.6      | 8.4        | 10.6       |

Crust, biologic soil crust; *N*, number of samples; wt %, weight percent; SD, standard deviation of the mean.
