# Supplementary material
Source: PubMed Central journal article supplement (PMC34633)
Supplement: pnas_121094298_6.pdf [file pnas_121094298_6.pdf]

**Table 5.** ICP geochemical summaries of rocks and surficial sediments grouped by site and averages for sandstone

| Site                    | Sample type          | Depth, cm | N | Al,<br>wt % | Ca, wt<br>% | K,<br>wt % | Mg,<br>wt % | Na, wt<br>% | P,<br>ppm | Mn,<br>ppm | Ce,<br>ppm | Nd,<br>ppm | Ni,<br>ppm | Pb,<br>ppm | Sr,<br>ppm | V,<br>ppm | Zn,<br>ppm |
|-------------------------|----------------------|-----------|---|-------------|-------------|------------|-------------|-------------|-----------|------------|------------|------------|------------|------------|------------|-----------|------------|
| 7U-3                    | Crust                | 0–0.5     | 1 | 2.6         | 1.70        | 1.70       | 0.59        | 0.15        | 300       | 340        | 30         | 14         | 9          | 15         | 60         | 22        | 20         |
|                         | Soil under crust     | 0.5–2.0   | 1 | 2.8         | 1.50        | 1.70       | 0.55        | 0.13        | 300       | 380        | 27         | 14         | 10         | 15         | 60         | 23        | 21         |
|                         | Soil under crust     | 2.0–5.0   | 1 | 3.2         | 0.79        | 1.80       | 0.47        | 0.12        | 300       | 420        | 33         | 16         | 12         | 13         | 60         | 29        | 23         |
|                         | <i>Red sandstone</i> |           | 1 | 2.3         | 1.90        | 1.70       | 0.13        | 0.05        | 200       | 260        | 24         | 12         | 8          | 7          | 38         | 16        | 10         |
| 7U-6                    | Crust                | 0–0.5     | 2 | 2.8         | 0.18        | 1.95       | 0.26        | 0.18        | 250       | 185        | 22         | 10.5       | 9.5        | 29.5       | 81.5       | 20.5      | 27         |
|                         | Soil under crust     | 0.5–2.0   | 1 | 2.8         | 0.17        | 2.00       | 0.27        | 0.17        | 200       | 190        | 22         | 10         | 10         | 32         | 88         | 20        | 26         |
|                         | Soil under crust     | 2.0–5.0   | 1 | 2.5         | 0.12        | 2.00       | 0.23        | 0.14        | 200       | 160        | 18         | 9          | 8          | 28         | 78         | 18        | 20         |
|                         | <i>Sandstone</i>     |           | 1 | 1.9         | 0.03        | 1.90       | 0.07        | 0.05        | 70        | 39         | 8          | 1          | 5          | 11         | 65         | 7         | 5          |
| 7U-7                    | Crust                | 0–0.5     | 1 | 2.6         | 3.10        | 1.40       | 0.51        | 0.26        | 300       | 200        | 28         | 13         | 10         | 15         | 90         | 21        | 27         |
|                         | Soil under crust     | 0.5–2.0   | 1 | 2.4         | 2.80        | 1.20       | 0.45        | 0.21        | 300       | 200        | 27         | 13         | 11         | 12         | 81         | 20        | 27         |
|                         | Soil under crust     | 2.0–5.0   | 1 | 2.6         | 2.70        | 1.20       | 0.39        | 0.20        | 300       | 190        | 27         | 14         | 11         | 10         | 77         | 21        | 32         |
|                         | <i>Sandstone</i>     |           | 1 | 1.2         | 7.90        | 0.75       | 0.07        | 0.03        | 90        | 100        | 10         | 6          | 7          | 5          | 50         | 5         | 9          |
| 7U-9                    | Crust                | 0–0.5     | 1 | 4.7         | 7.70        | 1.60       | 0.49        | 0.19        | 400       | 200        | 35         | 18         | 12         | 16         | 130        | 25        | 22         |
|                         | Soil under crust     | 0.5–2.0   | 1 | 4.9         | 5.50        | 1.70       | 0.37        | 0.13        | 200       | 140        | 27         | 14         | 11         | 13         | 100        | 22        | 20         |
|                         | Soil under crust     | 2.0–5.0   | 1 | 4.3         | 3.30        | 1.60       | 0.28        | 0.09        | 200       | 110        | 23         | 11         | 10         | 12         | 79         | 20        | 17         |
|                         | <i>Red sandstone</i> |           | 1 | 2.5         | 0.46        | 1.40       | 0.08        | 0.04        | 100       | 22         | 17         | 8          | 8          | 9          | 41         | 12        | 8          |
| 7U-12                   | Crust                | 0–0.5     | 2 | 1.55        | 0.84        | 0.93       | 0.25        | 0.11        | 200       | 130        | 14         | 6.5        | 6          | 9.5        | 46         | 13.5      | 13.5       |
|                         | Soil under crust     | 0.5–2.0   | 1 | 1.3         | 0.68        | 0.80       | 0.19        | 0.09        | 200       | 100        | 11         | 5          | 5          | 8          | 38         | 11        | 11         |
|                         | Soil under crust     | 2.0–5.0   | 1 | 1.5         | 0.61        | 0.87       | 0.20        | 0.10        | 200       | 120        | 12         | 6          | 6          | 6          | 38         | 12        | 12         |
|                         | <i>Sandstone</i>     |           | 1 | 1.2         | 0.05        | 0.62       | 0.05        | 0.02        | 60        | 50         | 7          | 1          | 5          | 5          | 21         | 7         | 7          |
| Averages, all sandstone |                      |           |   |             |             |            |             |             |           |            |            |            |            |            |            |           |            |
|                         | Crust                | 0–0.5     | 7 | 2.66        | 2.08        | 1.49       | 0.37        | 0.17        | 271       | 195.7      | 23.6       | 12.4       | 8.9        | 17.7       | 76.4       | 19.4      | 21.4       |
|                         | Soil under crust     | 0.5–2.0   | 5 | 2.84        | 2.13        | 1.48       | 0.37        | 0.15        | 240       | 202.0      | 22.8       | 11.2       | 9.4        | 16.0       | 73.4       | 19.2      | 21.0       |
|                         | Soil under crust     | 2.0–5.0   | 5 | 2.82        | 1.50        | 1.49       | 0.31        | 0.13        | 240       | 200.0      | 22.6       | 11.2       | 9.4        | 13.8       | 66.4       | 20.0      | 20.8       |
|                         | <i>Sandstone</i>     |           | 5 | 1.82        | 2.07        | 1.27       | 0.08        | 0.04        | 104       | 94.2       | 13.2       | 5.6        | 6.6        | 7.4        | 43.0       | 9.4       | 7.8        |

Crust, biologic soil crust; N, number of samples; wt %, weight percent.
